# Supplementary material
Source: Research Square preprint supplement (doi:10.21203/rs.3.rs-9194693/v1)
Supplement: Supplementary file 1 [file 99481cff5d736d6628ebbdd8.pdf]

Supporting file. 3 Antioxidant capacity of recombinant albumin in distilled water and hemoglobin solution

| Albumin  | AUC       | %           |
|----------|-----------|-------------|
| DW       | 249,831   | 94.91410162 |
| DW       | 260,576   | 98.99626925 |
| DW       | 254,194   | 96.57166303 |
| DW       | 274,212   | 104.176766  |
| DW       | 268,723   | 102.0914223 |
| DW       | 271,772   | 103.2497778 |
| 0.006 mM | 437,830   | 175.2504693 |
| 0.006 mM | 446,204   | 171.237566  |
| 0.006 mM | 479,859   | 188.7766824 |
| 0.006 mM | 472,320   | 172.2462912 |
| 0.006 mM | 479,477   | 178.4279723 |
| 0.006 mM | 443,662   | 163.2478695 |
| 0.06 mM  | 1,123,345 | 449.641958  |
| 0.06 mM  | 1,042,192 | 399.9570183 |
| 0.06 mM  | 1,155,914 | 454.7369332 |
| 0.06 mM  | 1,109,124 | 404.4768281 |
| 0.06 mM  | 1,069,512 | 397.9979384 |
| 0.06 mM  | 1,072,896 | 394.7779757 |
| 0.15 mM  | 1,005,572 | 402.5008906 |
| 0.15 mM  | 1,058,081 | 406.0546635 |
| 0.15 mM  | 1,034,221 | 406.8628685 |
| 0.15 mM  | 1,059,283 | 386.3007454 |
| 0.15 mM  | 1,022,346 | 380.4460355 |
| 0.15 mM  | 1,100,644 | 404.9880047 |
| 0.3 mM   | 1,014,540 | 406.0905172 |
| 0.3 mM   | 972,820   | 373.334459  |
| 0.3 mM   | 1,046,750 | 411.7917811 |
| 0.3 mM   | 1,030,620 | 375.8478841 |
| 0.3 mM   | 1,049,490 | 390.5471433 |
| 0.3 mM   | 1,028,570 | 378.4679805 |
| 0.6 mM   | 933,510   | 373.6565919 |

|        |         |             |
|--------|---------|-------------|
| 0.6 mM | 916,280 | 351.6363748 |
| 0.6 mM | 962,130 | 378.5022463 |
| 0.6 mM | 979,900 | 357.3512465 |
| 0.6 mM | 982,720 | 365.6999959 |
| 0.6 mM | 985,780 | 362.723165  |

| Albumin           | AUC         | %           |
|-------------------|-------------|-------------|
| DW + 3 $\mu$ M Hb | 435,720,000 | 95.06632701 |
| DW + 3 $\mu$ M Hb | 468,240,100 | 102.1616324 |
| DW + 3 $\mu$ M Hb | 436,976,800 | 95.34053834 |
| DW + 3 $\mu$ M Hb | 461,306,600 | 100.6488664 |
| DW + 3 $\mu$ M Hb | 469,935,100 | 102.5314511 |
| DW + 3 $\mu$ M Hb | 477,817,200 | 104.2511847 |
| 0.006 mM          | 417,926,000 | 95.91618471 |
| 0.006 mM          | 421,723,000 | 90.06554543 |
| 0.006 mM          | 425,992,000 | 97.48618233 |
| 0.006 mM          | 437,717,000 | 94.88635107 |
| 0.006 mM          | 424,441,000 | 90.31906746 |
| 0.006 mM          | 427,282,000 | 89.42373778 |
| 0.06 mM           | 313,558,000 | 71.96318737 |
| 0.06 mM           | 318,564,000 | 68.03432683 |
| 0.06 mM           | 280,177,000 | 64.11713391 |
| 0.06 mM           | 289,788,000 | 62.81895815 |
| 0.06 mM           | 264,889,000 | 56.36714517 |
| 0.06 mM           | 276,108,000 | 57.78527855 |
| 0.15 mM           | 201,876,800 | 46.3317727  |
| 0.15 mM           | 215,525,300 | 46.02880018 |
| 0.15 mM           | 174,865,200 | 40.01704438 |
| 0.15 mM           | 186,483,700 | 40.42510989 |
| 0.15 mM           | 158,061,600 | 33.63477212 |
| 0.15 mM           | 167,693,900 | 35.09582744 |
| 0.3 mM            | 97,615,300  | 22.40321766 |
| 0.3 mM            | 97,400,900  | 20.80148625 |
| 0.3 mM            | 81,624,800  | 18.67943561 |

|        |            |             |
|--------|------------|-------------|
| 0.3 mM | 81,464,900 | 17.65959993 |
| 0.3 mM | 72,173,800 | 15.3582484  |
| 0.3 mM | 70,909,100 | 14.84021504 |
| 0.6 mM | 33,128,200 | 7.60309373  |
| 0.6 mM | 33,543,800 | 7.163803356 |
| 0.6 mM | 27,391,500 | 6.268410588 |
| 0.6 mM | 27,015,700 | 5.856343699 |
| 0.6 mM | 24,331,400 | 5.177608568 |
| 0.6 mM | 23,681,600 | 4.956205009 |

| Albumin            | AUC         | %           |
|--------------------|-------------|-------------|
| DW + 30 $\mu$ M Hb | 518,982,700 | 94.60244383 |
| DW + 30 $\mu$ M Hb | 514,113,100 | 93.71479177 |
| DW + 30 $\mu$ M Hb | 555,640,700 | 101.2846249 |
| DW + 30 $\mu$ M Hb | 559,398,800 | 101.9696679 |
| DW + 30 $\mu$ M Hb | 579,448,800 | 105.6244699 |
| DW + 30 $\mu$ M Hb | 563,975,900 | 102.8040017 |
| 0.006 mM           | 497,612,600 | 95.88230976 |
| 0.006 mM           | 488,308,000 | 94.98065698 |
| 0.006 mM           | 557,815,300 | 100.391368  |
| 0.006 mM           | 545,585,200 | 97.53063467 |
| 0.006 mM           | 573,574,200 | 98.98617445 |
| 0.006 mM           | 552,915,300 | 98.03881691 |
| 0.06 mM            | 462,078,600 | 89.0354534  |
| 0.06 mM            | 441,854,200 | 85.94494091 |
| 0.06 mM            | 493,745,700 | 88.86060722 |
| 0.06 mM            | 485,438,200 | 86.77855584 |
| 0.06 mM            | 510,578,200 | 88.11446326 |
| 0.06 mM            | 507,610,500 | 90.00570769 |
| 0.15 mM            | 419,619,100 | 80.85415949 |
| 0.15 mM            | 416,665,400 | 81.04547424 |
| 0.15 mM            | 423,279,400 | 76.17861687 |
| 0.15 mM            | 424,611,700 | 75.9050073  |
| 0.15 mM            | 438,551,000 | 75.68416744 |

|         |             |             |
|---------|-------------|-------------|
| 0.15 mM | 434,050,900 | 76.96266809 |
| 0.3 mM  | 324,399,900 | 62.50688125 |
| 0.3 mM  | 291,860,660 | 56.76973802 |
| 0.3 mM  | 327,942,200 | 59.02055051 |
| 0.3 mM  | 317,648,100 | 56.7838365  |
| 0.3 mM  | 340,250,200 | 58.71963148 |
| 0.3 mM  | 319,070,900 | 56.5752721  |
| 0.6 mM  | 180,243,300 | 34.73011721 |
| 0.6 mM  | 178,552,000 | 34.73010122 |
| 0.6 mM  | 189,515,900 | 34.10763466 |
| 0.6 mM  | 196,805,900 | 35.18168076 |
| 0.6 mM  | 192,608,700 | 33.239986   |
| 0.6 mM  | 210,583,000 | 37.33900686 |
