# Supplementary material
Source: Research Square preprint supplement (doi:10.21203/rs.3.rs-9194693/v1)
Supplement: Supplementary file 2 [file a47fb6f2acb9e64630b92ae2.pdf]

Supporting file. 2 Antioxidant capacity of each solute in 3  $\mu$ M Hb solution

| Uric acid         | AUC         | %           |
|-------------------|-------------|-------------|
| DW + 3 $\mu$ M Hb | 448,816,200 | 92.93220015 |
| DW + 3 $\mu$ M Hb | 474,002,000 | 98.14718973 |
| DW + 3 $\mu$ M Hb | 478,947,800 | 99.17127058 |
| DW + 3 $\mu$ M Hb | 493,651,900 | 102.2159119 |
| DW + 3 $\mu$ M Hb | 505,687,100 | 104.707929  |
| DW + 3 $\mu$ M Hb | 496,595,900 | 102.8254987 |
| 0.0045 mM         | 462,012,500 | 102.9402459 |
| 0.0045 mM         | 488,330,400 | 103.0228564 |
| 0.0045 mM         | 461,158,500 | 96.2857539  |
| 0.0045 mM         | 466,981,900 | 94.59740761 |
| 0.0045 mM         | 469,537,100 | 92.85131062 |
| 0.0045 mM         | 491,991,300 | 99.07276721 |
| 0.045 mM          | 460,218,700 | 102.5405723 |
| 0.045 mM          | 492,683,600 | 103.9412492 |
| 0.045 mM          | 483,047,000 | 100.8558762 |
| 0.045 mM          | 493,355,500 | 99.93995769 |
| 0.045 mM          | 481,407,800 | 95.19875037 |
| 0.045 mM          | 501,584,900 | 101.0046398 |
| 0.1125 mM         | 480,757,500 | 107.1167886 |
| 0.1125 mM         | 539,741,300 | 113.8689921 |
| 0.1125 mM         | 517,629,400 | 108.0763707 |
| 0.1125 mM         | 503,411,400 | 101.9770004 |
| 0.1125 mM         | 514,079,900 | 101.6596824 |
| 0.1125 mM         | 551,299,400 | 111.0156971 |
| 0.225 mM          | 514,226,400 | 114.5739392 |
| 0.225 mM          | 489,089,000 | 103.182898  |
| 0.225 mM          | 511,592,200 | 106.8158576 |
| 0.225 mM          | 538,984,000 | 109.1830093 |
| 0.225 mM          | 495,725,300 | 98.03004664 |
| 0.225 mM          | 536,511,300 | 108.037803  |
| 0.45 mM           | 484,292,100 | 107.904327  |
| 0.45 mM           | 496,734,300 | 104.7958236 |

|         |             |             |
|---------|-------------|-------------|
| 0.45 mM | 495,888,000 | 103.5369616 |
| 0.45 mM | 512,399,200 | 103.7976761 |
| 0.45 mM | 491,870,500 | 97.26775708 |
| 0.45 mM | 500,918,900 | 100.8705267 |

| Ascorbic acid     | AUC         | %           |
|-------------------|-------------|-------------|
| DW + 3 $\mu$ M Hb | 532,258,500 | 97.43843376 |
| DW + 3 $\mu$ M Hb | 543,973,300 | 99.58301532 |
| DW + 3 $\mu$ M Hb | 555,561,600 | 101.704439  |
| DW + 3 $\mu$ M Hb | 527,188,300 | 96.51025253 |
| DW + 3 $\mu$ M Hb | 534,487,100 | 97.84641464 |
| DW + 3 $\mu$ M Hb | 584,037,700 | 106.9174447 |
| 0.01 mM           | 534,744,800 | 100.4671226 |
| 0.01 mM           | 552,963,300 | 101.6526546 |
| 0.01 mM           | 581,092,100 | 104.59544   |
| 0.01 mM           | 568,186,700 | 107.7768038 |
| 0.01 mM           | 565,919,900 | 105.8809277 |
| 0.01 mM           | 569,119,900 | 97.44574708 |
| 0.1 mM            | 549,255,800 | 103.1934295 |
| 0.1 mM            | 541,779,200 | 99.596653   |
| 0.1 mM            | 515,912,800 | 92.86329365 |
| 0.1 mM            | 557,212,700 | 105.6951947 |
| 0.1 mM            | 576,799,900 | 107.9165241 |
| 0.1 mM            | 572,945,500 | 98.10077329 |
| 1 mM              | 459,511,300 | 86.33235543 |
| 1 mM              | 492,320,700 | 90.50457072 |
| 1 mM              | 479,224,900 | 86.2595435  |
| 1 mM              | 493,476,900 | 93.60543472 |
| 1 mM              | 475,152,400 | 88.8987592  |
| 1 mM              | 493,423,500 | 84.48487144 |
| 10 mM             | 6,267,378   | 1.177506418 |
| 10 mM             | 5,894,155   | 1.083537556 |
| 10 mM             | 5,229,755   | 0.941345658 |
| 10 mM             | 6,680,336   | 1.267163175 |

|        |           |             |
|--------|-----------|-------------|
| 10 mM  | 3,922,754 | 0.733928658 |
| 10 mM  | 3,739,856 | 0.640344964 |
| 100 mM | 1,263     | 0.000237291 |
| 100 mM | 1,346     | 0.000247439 |
| 100 mM | 1,064     | 0.000191518 |
| 100 mM | 1,102     | 0.000209033 |
| 100 mM | 992       | 0.000185598 |
| 100 mM | 1,061     | 0.000181666 |

| Glutathione       | AUC         | %           |
|-------------------|-------------|-------------|
| DW + 3 $\mu$ M Hb | 455,985,400 | 94.54974787 |
| DW + 3 $\mu$ M Hb | 469,254,500 | 97.30112996 |
| DW + 3 $\mu$ M Hb | 481,143,300 | 99.76630328 |
| DW + 3 $\mu$ M Hb | 476,523,200 | 98.80831364 |
| DW + 3 $\mu$ M Hb | 506,632,000 | 105.0514509 |
| DW + 3 $\mu$ M Hb | 504,083,700 | 104.5230543 |
| 1 mM              | 211,760,300 | 46.44014918 |
| 1 mM              | 212,475,500 | 45.27937399 |
| 1 mM              | 186,928,500 | 38.85089951 |
| 1 mM              | 187,791,200 | 39.40861641 |
| 1 mM              | 181,801,200 | 35.88427103 |
| 1 mM              | 185,615,700 | 36.82239676 |
| 5 mM              | 41,600,540  | 9.123217542 |
| 5 mM              | 40,533,930  | 8.637941671 |
| 5 mM              | 24,007,710  | 4.989721357 |
| 5 mM              | 23,218,360  | 4.872451121 |
| 5 mM              | 13,948,040  | 2.753091001 |
| 5 mM              | 14,473,190  | 2.87118786  |
| 10 mM             | 5,930,590   | 1.300609625 |
| 10 mM             | 6,743,160   | 1.436994211 |
| 10 mM             | 1,709,723   | 0.355345902 |
| 10 mM             | 1,733,433   | 0.363766759 |
| 10 mM             | 387,719     | 0.076528723 |

|        |         |             |
|--------|---------|-------------|
| 10 mM  | 551,847 | 0.109475272 |
| 50 mM  | 10,202  | 0.002237352 |
| 50 mM  | 9,979   | 0.002126565 |
| 50 mM  | 4,459   | 0.000926751 |
| 50 mM  | 4,697   | 0.000985681 |
| 50 mM  | 5,016   | 0.000990068 |
| 50 mM  | 4,883   | 0.000968688 |
| 100 mM | 2,540   | 0.000557035 |
| 100 mM | 2,454   | 0.000522957 |
| 100 mM | 2,163   | 0.000449554 |
| 100 mM | 2,085   | 0.000437544 |
| 100 mM | 2,186   | 0.000431477 |
| 100 mM | 2,254   | 0.000447148 |

| Glycerin          | AUC         | %           |
|-------------------|-------------|-------------|
| DW + 3 $\mu$ M Hb | 486,888,700 | 94.64040509 |
| DW + 3 $\mu$ M Hb | 527,389,600 | 102.5128851 |
| DW + 3 $\mu$ M Hb | 507,413,100 | 98.62989495 |
| DW + 3 $\mu$ M Hb | 516,354,800 | 100.3679639 |
| DW + 3 $\mu$ M Hb | 514,788,100 | 100.063432  |
| DW + 3 $\mu$ M Hb | 533,936,300 | 103.785419  |
| 0.013696 M        | 504,358,200 | 103.5879863 |
| 0.013696 M        | 478,290,400 | 90.69014634 |
| 0.013696 M        | 490,675,100 | 96.70130708 |
| 0.013696 M        | 528,771,700 | 102.4047225 |
| 0.013696 M        | 517,667,000 | 100.5592398 |
| 0.013696 M        | 512,822,300 | 96.0455957  |
| 0.136967 M        | 468,171,200 | 96.15569226 |
| 0.136967 M        | 491,843,900 | 93.26006808 |
| 0.136967 M        | 475,651,500 | 93.74048482 |
| 0.136967 M        | 495,175,700 | 95.89834354 |
| 0.136967 M        | 479,684,900 | 93.18103896 |
| 0.136967 M        | 511,089,100 | 95.72098769 |
| 1.369565 M        | 430,471,400 | 88.41269062 |

|            |             |             |
|------------|-------------|-------------|
| 1.369565 M | 486,859,800 | 92.31501721 |
| 1.369565 M | 458,170,400 | 90.29534318 |
| 1.369565 M | 468,707,900 | 90.77244949 |
| 1.369565 M | 434,248,000 | 84.35470828 |
| 1.369565 M | 485,123,600 | 90.8579544  |
| 4.108696 M | 414,514,500 | 85.13537077 |
| 4.108696 M | 427,061,700 | 80.97651148 |
| 4.108696 M | 435,739,000 | 85.87460592 |
| 4.108696 M | 388,713,100 | 75.28023367 |
| 4.108696 M | 414,736,300 | 80.56446915 |
| 4.108696 M | 392,768,200 | 73.56087234 |
| 6.847826 M | 373,614,400 | 76.73507313 |
| 6.847826 M | 378,269,600 | 71.72488801 |
| 6.847826 M | 367,345,600 | 72.3957659  |
| 6.847826 M | 375,414,700 | 72.70479523 |
| 6.847826 M | 373,253,800 | 72.50629919 |
| 6.847826 M | 380,430,900 | 71.2502409  |
