# Supplementary material
Source: Research Square preprint supplement (doi:10.21203/rs.3.rs-9194693/v1)
Supplement: Supplementary file 3 [file aa3f52bb7f3875ef06e1e83e.pdf]

Supporting file. 1 Antioxidant capacity of each solute in distilled water

| Uric acid | AUC     | %           |
|-----------|---------|-------------|
| DW        | 215,302 | 74.84248636 |
| DW        | 212,653 | 73.92165076 |
| DW        | 299,091 | 103.9689092 |
| DW        | 313,785 | 109.0767832 |
| DW        | 333,660 | 115.9856574 |
| DW        | 351,550 | 122.2045131 |
| 0.0045 mM | 200,164 | 92.96894595 |
| 0.0045 mM | 195,782 | 92.06641806 |
| 0.0045 mM | 267,865 | 89.55969922 |
| 0.0045 mM | 259,574 | 82.72352088 |
| 0.0045 mM | 296,057 | 88.73014446 |
| 0.0045 mM | 282,684 | 80.41075238 |
| 0.045 mM  | 113,624 | 52.77424269 |
| 0.045 mM  | 112,706 | 52.99995768 |
| 0.045 mM  | 115,885 | 38.7457329  |
| 0.045 mM  | 108,111 | 34.45384579 |
| 0.045 mM  | 135,602 | 40.64077204 |
| 0.045 mM  | 137,448 | 39.09771014 |
| 0.1125 mM | 64,926  | 30.15578118 |
| 0.1125 mM | 72,281  | 33.99011535 |
| 0.1125 mM | 75,156  | 25.12813826 |
| 0.1125 mM | 81,435  | 25.95248339 |
| 0.1125 mM | 82,841  | 24.82796859 |
| 0.1125 mM | 90,668  | 25.7909259  |
| 0.225 mM  | 47,535  | 22.07829003 |
| 0.225 mM  | 46,564  | 21.89670496 |
| 0.225 mM  | 57,979  | 19.3850701  |
| 0.225 mM  | 56,483  | 18.00054177 |
| 0.225 mM  | 56,781  | 17.01762273 |
| 0.225 mM  | 57,327  | 16.30692647 |
| 0.45 mM   | 27,120  | 12.59626014 |
| 0.45 mM   | 27,589  | 12.97371775 |

|         |        |             |
|---------|--------|-------------|
| 0.45 mM | 34,630 | 11.57841593 |
| 0.45 mM | 35,508 | 11.31602849 |
| 0.45 mM | 36,158 | 10.83677996 |
| 0.45 mM | 35,977 | 10.23382165 |

| Ascorbic acid | AUC     | %           |
|---------------|---------|-------------|
| DW            | 301,887 | 87.33543139 |
| DW            | 303,621 | 87.83707485 |
| DW            | 329,719 | 95.38718495 |
| DW            | 363,204 | 105.0743425 |
| DW            | 380,934 | 110.2036034 |
| DW            | 394,618 | 114.162363  |
| 0.01 mM       | 284,982 | 94.4002226  |
| 0.01 mM       | 311,661 | 102.6480382 |
| 0.01 mM       | 347,226 | 105.3096728 |
| 0.01 mM       | 342,453 | 94.28668186 |
| 0.01 mM       | 381,944 | 100.2651378 |
| 0.01 mM       | 369,604 | 93.6612116  |
| 0.1 mM        | 250,797 | 83.07644913 |
| 0.1 mM        | 248,022 | 81.68802553 |
| 0.1 mM        | 294,192 | 89.22506741 |
| 0.1 mM        | 292,292 | 80.47598595 |
| 0.1 mM        | 309,058 | 81.1316396  |
| 0.1 mM        | 307,420 | 77.90318739 |
| 1 mM          | 124,059 | 41.0945155  |
| 1 mM          | 128,410 | 42.29285853 |
| 1 mM          | 149,973 | 45.48509488 |
| 1 mM          | 157,196 | 43.28036035 |
| 1 mM          | 143,739 | 37.73330813 |
| 1 mM          | 155,475 | 39.39886168 |
| 10 mM         | 4,940   | 1.636373875 |
| 10 mM         | 4,642   | 1.528879755 |
| 10 mM         | 4,950   | 1.501278361 |
| 10 mM         | 4,704   | 1.295139921 |

|        |       |             |
|--------|-------|-------------|
| 10 mM  | 4,610 | 1.210183391 |
| 10 mM  | 4,390 | 1.11246826  |
| 100 mM | 1,169 | 0.387230984 |
| 100 mM | 1,143 | 0.376456174 |
| 100 mM | 968   | 0.293583324 |
| 100 mM | 913   | 0.251373884 |
| 100 mM | 862   | 0.226285918 |
| 100 mM | 822   | 0.208302713 |

| Glutathione | AUC     | %           |
|-------------|---------|-------------|
| DW          | 226,591 | 92.6861859  |
| DW          | 224,644 | 91.88977296 |
| DW          | 244,487 | 100.0064766 |
| DW          | 292,309 | 119.5678836 |
| DW          | 240,513 | 98.38092699 |
| DW          | 238,283 | 97.46875398 |
| 5 mM        | 191,987 | 84.7284314  |
| 5 mM        | 191,669 | 85.32121935 |
| 5 mM        | 187,631 | 76.7447758  |
| 5 mM        | 185,257 | 63.37711121 |
| 5 mM        | 184,573 | 76.74138196 |
| 5 mM        | 181,306 | 76.0885166  |
| 10 mM       | 54,114  | 23.88179583 |
| 10 mM       | 53,358  | 23.752248   |
| 10 mM       | 64,643  | 26.44026063 |
| 10 mM       | 61,885  | 21.1710895  |
| 10 mM       | 50,921  | 21.17182855 |
| 10 mM       | 54,008  | 22.665486   |
| 50 mM       | 2,776   | 1.225114855 |
| 50 mM       | 2,746   | 1.222378519 |
| 50 mM       | 2,243   | 0.917431193 |
| 50 mM       | 2,307   | 0.789233311 |
| 50 mM       | 2,009   | 0.835297884 |
| 50 mM       | 1,901   | 0.797790862 |

|        |       |             |
|--------|-------|-------------|
| 100 mM | 1,657 | 0.731273528 |
| 100 mM | 1,600 | 0.71223803  |
| 100 mM | 1,352 | 0.552994638 |
| 100 mM | 1,365 | 0.466971595 |
| 100 mM | 928   | 0.38584193  |
| 100 mM | 1,038 | 0.435616473 |

| Glycerin   | AUC     | %           |
|------------|---------|-------------|
| DW         | 261,149 | 94.51441518 |
| DW         | 264,262 | 95.64106462 |
| DW         | 278,103 | 100.6503659 |
| DW         | 295,073 | 106.7921073 |
| DW         | 276,505 | 100.0720216 |
| DW         | 282,744 | 102.3300254 |
| 0.013696 M | 251,866 | 96.44532432 |
| 0.013696 M | 253,630 | 95.97672007 |
| 0.013696 M | 283,675 | 102.0035742 |
| 0.013696 M | 273,611 | 92.72654563 |
| 0.013696 M | 266,483 | 96.37547241 |
| 0.013696 M | 259,218 | 91.67939903 |
| 0.136967 M | 217,011 | 83.09853762 |
| 0.136967 M | 214,100 | 81.01808054 |
| 0.136967 M | 232,867 | 83.73408413 |
| 0.136967 M | 241,122 | 81.71604993 |
| 0.136967 M | 224,108 | 81.05025226 |
| 0.136967 M | 223,265 | 78.96365617 |
| 1.369565 M | 111,601 | 42.73460745 |
| 1.369565 M | 116,761 | 44.18380244 |
| 1.369565 M | 127,651 | 45.90061955 |
| 1.369565 M | 130,627 | 44.26938419 |
| 1.369565 M | 115,591 | 41.80430734 |
| 1.369565 M | 123,923 | 43.82869309 |
| 4.108696 M | 58,657  | 22.46112373 |
| 4.108696 M | 59,013  | 22.33124702 |

|            |        |             |
|------------|--------|-------------|
| 4.108696 M | 67,544 | 24.28740431 |
| 4.108696 M | 67,226 | 22.78283679 |
| 4.108696 M | 61,664 | 22.30122421 |
| 4.108696 M | 62,559 | 22.12566845 |
| 6.847826 M | 40,383 | 15.46358592 |
| 6.847826 M | 40,566 | 15.35067471 |
| 6.847826 M | 46,794 | 16.82613996 |
| 6.847826 M | 46,615 | 15.79778563 |
| 6.847826 M | 41,995 | 15.18779046 |
| 6.847826 M | 41,534 | 14.68961322 |
